# Supplementary material for: Co-CeOx nanoparticles anchored on a nitrogen-doped carbon nanosheet: a synergistic effect for highly efficient hydrolysis of sodium borohydride
Source: Royal Society of Chemistry journal article supplement (doi:10.1039/d0qi01244k), 2020-12-09
Supplement: d0qi01244k1.pdf [file d0qi01244k1.pdf]

## Electronic Supporting Information (ESI)

### **Co-CeO<sub>x</sub> Nanoparticles Anchored on Nitrogen-Doped Carbon Nanosheet: Synergistic Effect for Highly Efficient Hydrolysis of Sodium Borohydride**

Longhua Yao,<sup>a</sup> Xiugang Li,<sup>a</sup> Wenfan, Peng,<sup>a</sup> Qilu Yao,<sup>a</sup> Jianhui Xia,<sup>\*b</sup> Zhang-Hui Lu<sup>\*a</sup>

<sup>a</sup>Institute of Advanced Materials, College of Chemistry and Chemical Engineering,  
Jiangxi Normal University, Nanchang 330022, China

<sup>b</sup>National Engineering Research Centre for Carbohydrate Synthesis, Jiangxi Normal  
University, Nanchang 330022, China

\*Corresponding author: E-mail: [luzh@jxnu.edu.cn](mailto:luzh@jxnu.edu.cn)

## **Table of Contents**

### **Experimental section**

**Figure S1** HRTEM and SAED pattern of Co-CeO<sub>x</sub>/NCNS.

**Figure S2** X-ray diffraction patterns for the as-synthesized catalysts.

**Figure S3** EDX pattern of Co-CeO<sub>x</sub>/NCNS.

**Figure S4** the survey XPS spectrum and XPS spectrum of N 1s of Co-CeO<sub>x</sub>/NCNS.

**Figure S5** NaBH<sub>4</sub> hydrolysis over Co-CeO<sub>x</sub> immobilized on different supports.

**Figure S6** NaBH<sub>4</sub> hydrolysis over Co-CeO<sub>x</sub> immobilized on NCNS synthesized by varying different temperatures and precursor mass ratios.

**Figure S7** NaBH<sub>4</sub> hydrolysis over Co-CeO<sub>x</sub>/NCNS with different NaOH concentration

**Figure S8** NaBH<sub>4</sub> hydrolysis over Co-CeO<sub>x</sub>/NCNS with different Ce/(Co+Ce) ratio and Co loadings.

**Figure S9** NaBH<sub>4</sub> hydrolysis over different catalysts.

**Figure S10** NaBH<sub>4</sub> hydrolysis over Co-CeO<sub>x</sub>/NCNS with different concentration of catalyst and NaBH<sub>4</sub>.

**Figure S11** Stability test of NaBH<sub>4</sub> hydrolysis over Co-CeO<sub>x</sub>/NCNS.

**Table S1** ICP-AES results for the as-synthesized catalysts.

**Table S2** Comparison of HGR and  $E_a$  with previous studies.

### **References**

## Experimental section

### Materials and Reagents

Cerium nitrate hexahydrate ( $\text{Ce}(\text{NO}_3)_3 \cdot 6\text{H}_2\text{O}$ , Aladdin, 99.95%), *cobalt chloride* hexahydrate ( $\text{CoCl}_2 \cdot 6\text{H}_2\text{O}$ , Aladdin, AR), potassium citrate monohydrate ( $\text{C}_6\text{H}_5\text{K}_3\text{O}_7 \cdot \text{H}_2\text{O}$ , Aladdin, 99%), 2-Methylimidazole ( $\text{C}_4\text{H}_6\text{N}_2$ , Aladdin, 98%), zinc nitrate hexahydrate ( $\text{Zn}(\text{NO}_3)_2 \cdot 6\text{H}_2\text{O}$ , Macklin, 99%), sodium hydroxide (NaOH, Tianjin Fuchen Chemical Reagent, >96%), sodium borohydride ( $\text{NaBH}_4$ , Acros organics, 98%), nickel chloride hexahydrate ( $\text{NiCl}_2 \cdot 6\text{H}_2\text{O}$ , Aladdin, 99.9%), iron(II) sulfate heptahydrate ( $\text{FeSO}_4 \cdot 7\text{H}_2\text{O}$ , Sinopharm Chemical Reagent Co., Ltd., 99%), cupric chloride dehydrate ( $\text{CuCl}_2 \cdot 2\text{H}_2\text{O}$ , Aladdin, 99.99%), lanthanum(III) nitrate hexahydrate ( $\text{La}(\text{NO}_3)_3 \cdot 6\text{H}_2\text{O}$ , Aladdin, 99%), neodymium(III) nitrate hexahydrate ( $\text{Nd}(\text{NO}_3)_3 \cdot 6\text{H}_2\text{O}$ , Aladdin, 99.9%), yttrium(III) nitrate hexahydrate ( $\text{Y}(\text{NO}_3)_3 \cdot 6\text{H}_2\text{O}$ ), and praseodymium(III) nitrate hexahydrate ( $\text{Pr}(\text{NO}_3)_3 \cdot 6\text{H}_2\text{O}$ ) were used as received.

### Characterization

Powder X-ray diffraction (XRD) patterns were carried out with X-ray diffractometer of Rigaku RINT-2200, using graphite monochromatized Cu K $\alpha$  radiation ( $\lambda = 1.54 \text{ \AA}$ ) at a scanning rate of  $4^\circ/\text{min}$ . An inductively coupled plasma (ICP) spectrophotometer (Varian, 725-ES) was used to determine the chemical components of the as-synthesized catalysts after the sample digested by microwave. Organic element analysis (OEA) was carried out on an EA3000 elemental analyzer (Euro EA3000, Euro Vector, Milano, Italy). The Brunauer-Emmett-Teller (BET) equation method was used to analyze the specific surface areas, on the basis of nitrogen adsorption-desorption isotherms which was recorded on a BELSORP-mini II at 77 K. X-ray photoelectron spectroscopy (XPS) analyses were carried out on an ESCALAB 250XI X-ray photoelectron spectrometer using an Al K $\alpha$  source. Transmission electron microscopy (TEM) and scanning transmission electron microscopy (STEM) images and energy-dispersive X-ray spectroscopy (EDS) mapping analyses were recorded on SU-8020 and JEM-2100 with Super-X EDS system under operating voltages of 300

kV.

### Synthesis of ZIF-8

ZIF-8 is synthesized according to previous literature.<sup>47</sup> Typically, 10 mmol  $\text{Zn}(\text{NO}_3)_2 \cdot 6\text{H}_2\text{O}$  and 80mmol 2-methylimidazole is dispersed in 40ml methanol respectively. The zinc nitrate solution was added dropwise to the 2-methylimidazole solution, standing for 24 hours at room temperature, The white precipitate was separated by centrifugation and washed with methanol several times. After drying in a vacuum oven at 333 K overnight, the resulting white solid powder is the ZIF-8. As shown in SEM, the as-synthesized ZIF-8 shows a uniform rhombic dodecahedron structure.

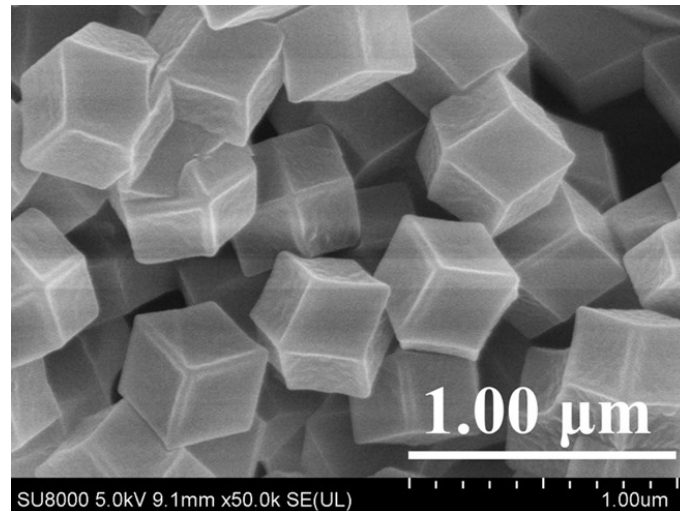

SEM image of the as-synthesized ZIF-8.

### Calculation methods

The Hydrogen generation rate (HGR) is based on the mass of Co, which was calculated from the equation below:

$$HGR = \frac{V_{H_2}}{m_{Co} t_{min}}$$

In the equation,  $V_{H_2}$  is the total volume of generated  $\text{H}_2$ ,  $m_{Co}$  is the mass of Co atoms in catalyst, and  $t_{min}$  is the completion time of the reaction in minute.

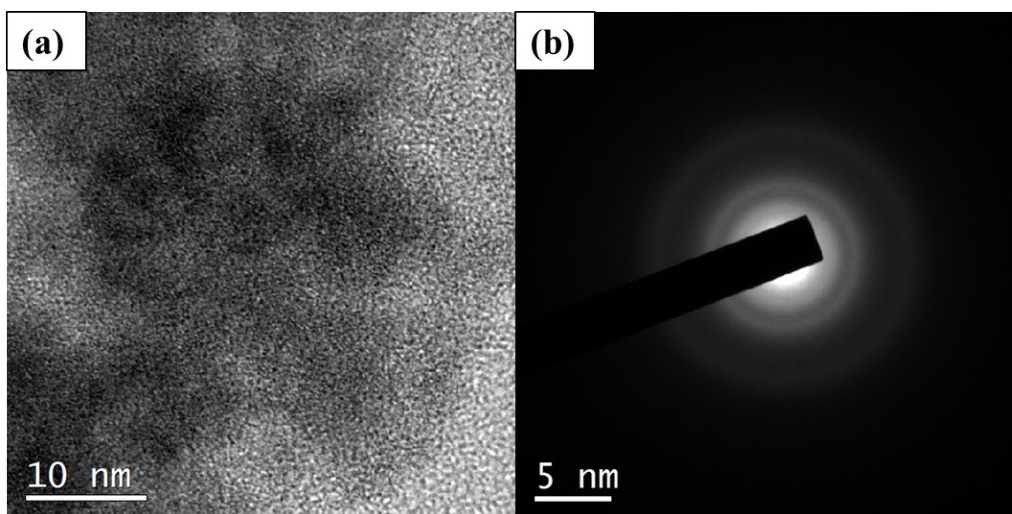

**Figure S1** HRTEM and corresponding SAED pattern of Co-CeO<sub>x</sub>/NCNS.

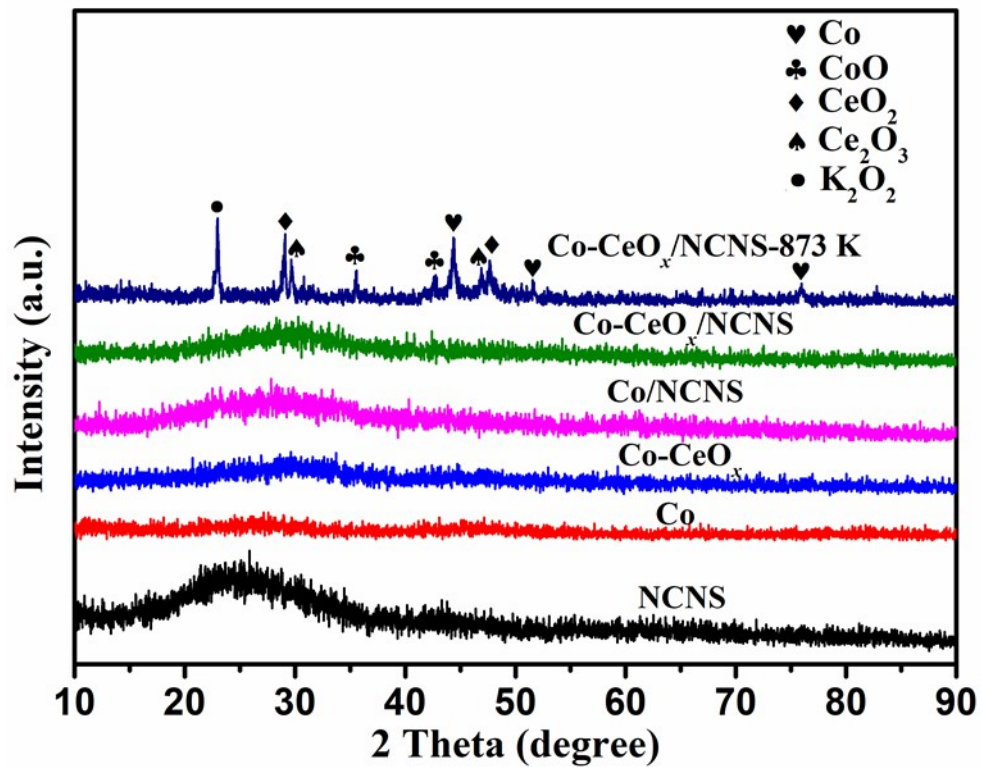

**Figure S2** X-ray diffraction patterns for the NCNS, Co, Co-CeO<sub>x</sub>, Co/NCNS, Co-CeO<sub>x</sub>/NCNS, and Co-CeO<sub>x</sub>/NCNS annealed at 773 K for 4 h under Ar in tube furnace.

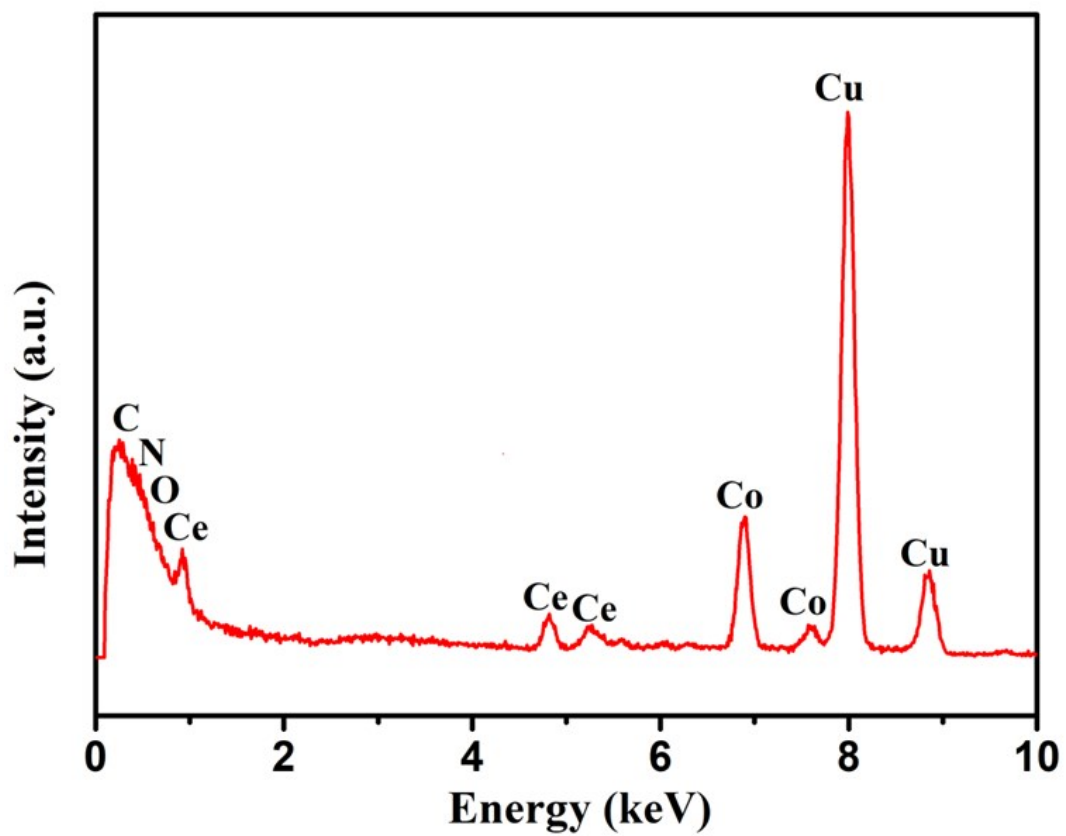

Figure S3 EDX pattern of Co-CeO<sub>x</sub>/NCNS.

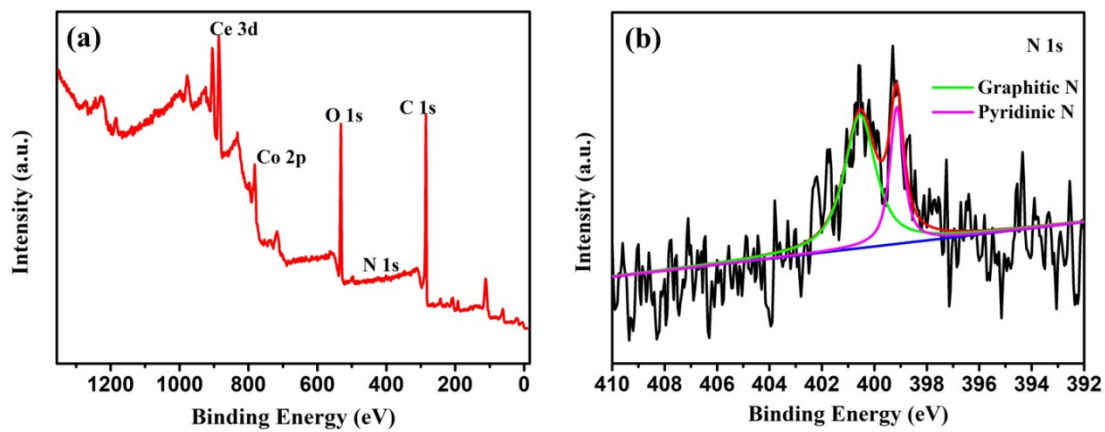

**Figure S4** (a) the survey XPS spectrum and (b) XPS spectrum of N 1s of Co-CeO<sub>x</sub>/NCNS.



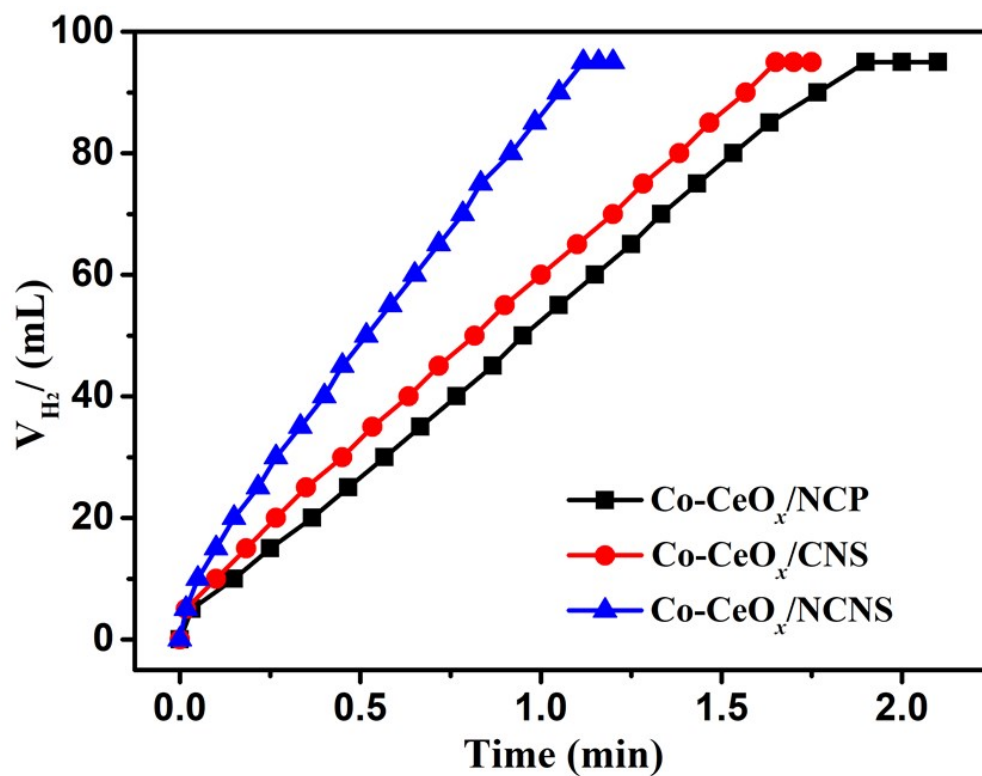

**Figure S5** Time plots for hydrogen release from  $\text{NaBH}_4$  (200mM, 5mL) catalyzed by  $\text{Co-CeO}_x/\text{NCNS}$ ,  $\text{Co-CeO}_x/\text{NCP}$ , and  $\text{Co-CeO}_x/\text{CNS}$  respectively.

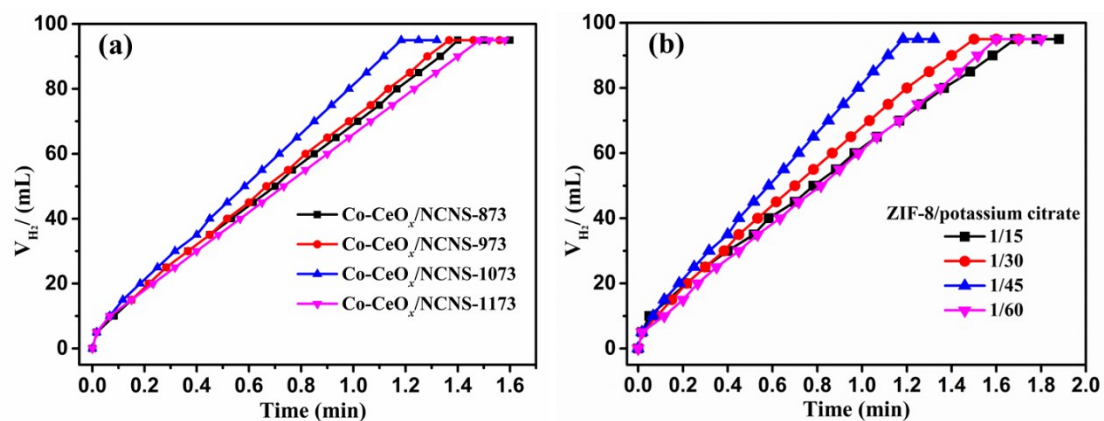

**Figure S6** Time plots for hydrogen release from NaBH<sub>4</sub> (200mM, 5mL) catalyzed by Co-CeO<sub>x</sub>/NCNS (a) synthesized by varying different temperatures and (b) different precursors of ratio (ZIF-8/potassium citrate) at 303 K ( $c_{NaOH}=0.4$  M,  $n_{Co}=0.05$  mmol).

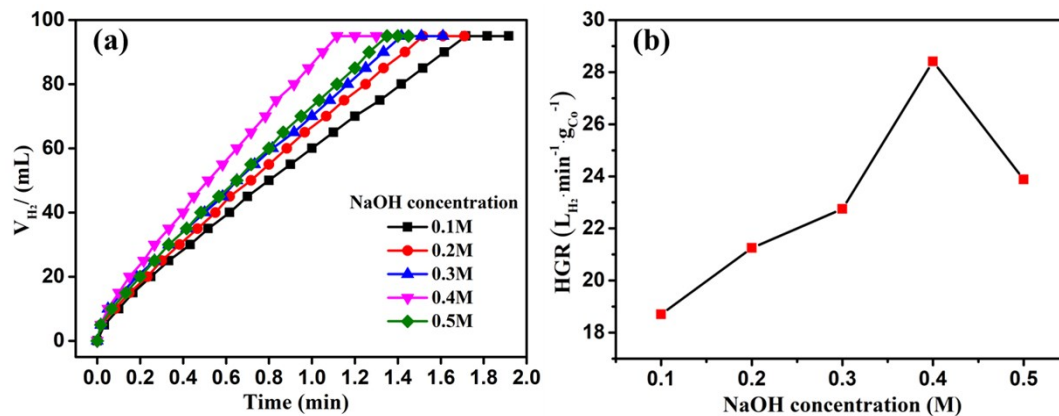

**Figure S7** (a) Volume of the generated hydrogen versus time and (b) corresponding HGR for  $NaBH_4$  dehydrogenation over  $Co-CeO_x/NCNS$  catalysts with different NaOH concentration at 303 K.

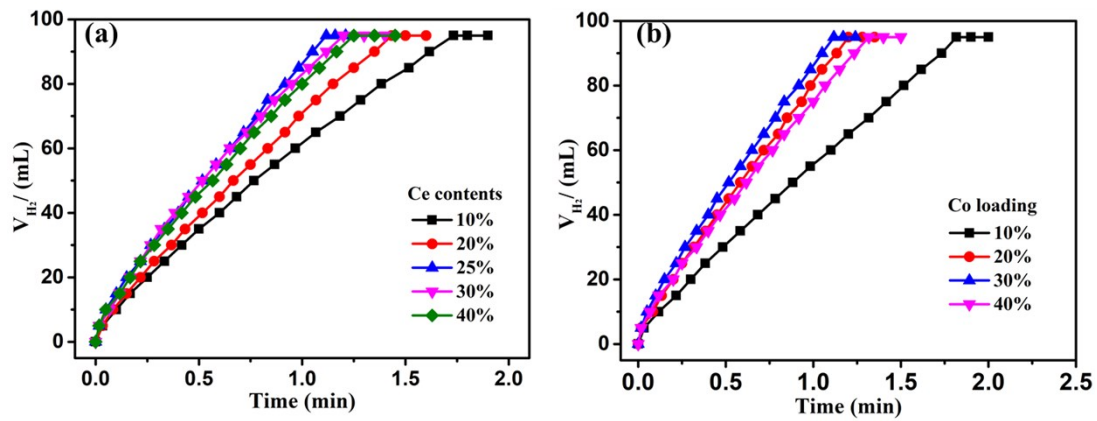

**Figure S8** Time plots for hydrogen release from  $\text{NaBH}_4$  (200mM, 5mL) catalyzed by  $\text{Co-CeO}_x/\text{NCNS}$  with (a) different molar ratio of  $n_{\text{Ce}}/n_{\text{Co+Ce}}$ , (b) different Co loadings at 303 K ( $c_{\text{NaOH}}=0.4 \text{ M}$ ,  $n_{\text{Co}}=0.05 \text{ mmol}$ ).

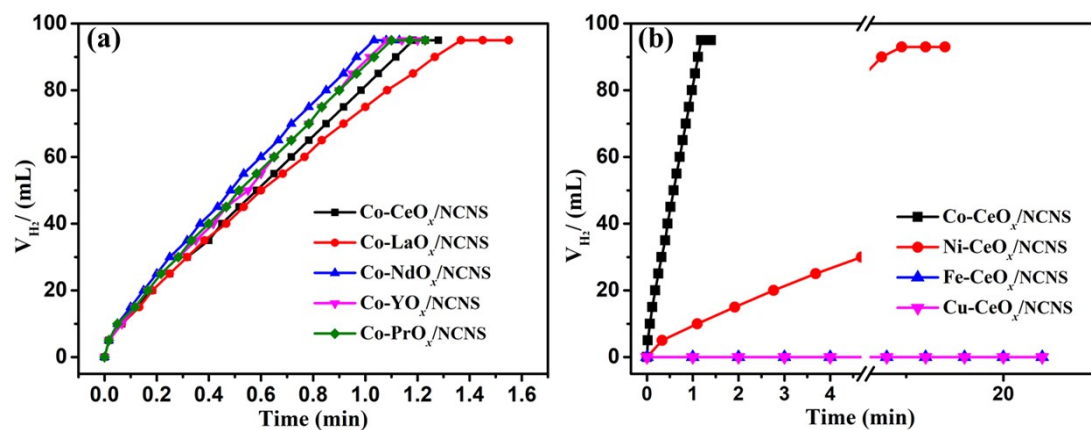

**Figure S9** Time plots for hydrogen release from NaBH<sub>4</sub> (200mM, 5mL) catalyzed by (a) Co-RO<sub>x</sub>/NCNS (R = Ce, La, Nd, Y, Pr) and (b) M-CeO<sub>x</sub>/NCNS (M = Co, Ni, Fe, Cu) at 303 K ( $c_{NaOH}=0.4$  M,  $n_{Co}=0.05$  mmol).

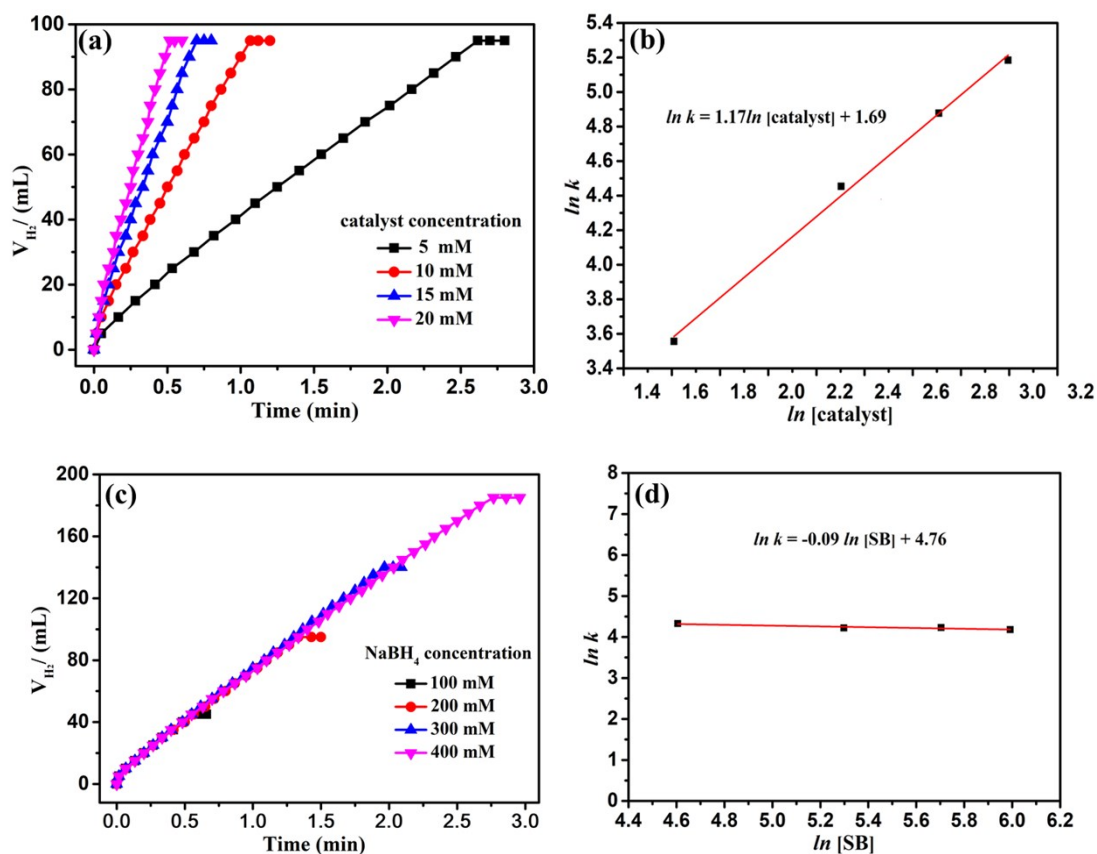

**Figure S10** Time plots for hydrogen release from NaBH<sub>4</sub> catalyzed by Co-CeO<sub>x</sub>/NCNS with (a) different catalyst concentration, and (c) different NaBH<sub>4</sub> concentration. Plot of the hydrogen generation rate versus (b) metal concentration and (d) NaBH<sub>4</sub> concentration, respectively, both in logarithmic scale.

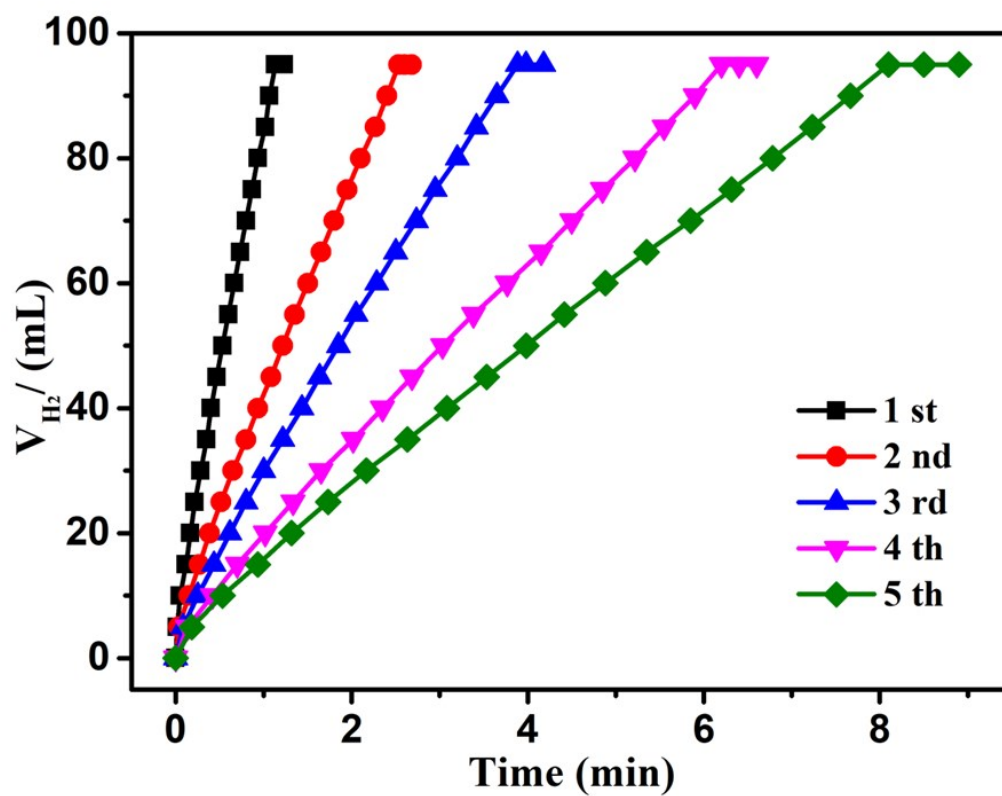

**Figure S11** Stability test for  $H_2$  release from  $NaBH_4$  over the  $Co-CeO_x/NCNS$  catalyst with  $NaOH$  ( $c_{NaOH}=0.4$  M,  $n_{Co}=0.05$  mmol) at 303 K.

**Table S1** ICP-AES results for the as-synthesized Co-CeO<sub>x</sub>/NCNS catalysts.

| <b>Catalysts loading</b> |                           | <b>Co (wt %) : Ce (wt %)</b> | <b>Co : Ce (atomic ratio)</b> |
|--------------------------|---------------------------|------------------------------|-------------------------------|
| 10%                      | Co-CeO <sub>x</sub> /NCNS | 9.21 : 7.51                  | 0.0467 : 0.0160               |
| 20%                      | Co-CeO <sub>x</sub> /NCNS | 20.42 : 16.29                | 0.0493 : 0.0165               |
| 30%                      | Co-CeO <sub>x</sub> /NCNS | 27.84 : 22.12                | 0.0497 : 0.0166               |
| 40%                      | Co-CeO <sub>x</sub> /NCNS | 36.29 : 28.85                | 0.0498 : 0.0166               |



**Table S2** Comparison of HGR and activation energy ( $E_a$ ) in this study with those reported in previous studies.

| catalyst                              | reiation temperature (K) | HGR ( $\text{mL}_{\text{H}_2} \cdot \text{min}^{-1} \cdot \text{g}_\text{M}^{-1}$ ) | $E_a$ ( $\text{kJ} \cdot \text{mol}^{-1}$ ) | Ref.             |
|---------------------------------------|--------------------------|-------------------------------------------------------------------------------------|---------------------------------------------|------------------|
| Co@ZIF-8                              | 303                      | 14000                                                                               | 62.9                                        | 42               |
| Co@C <sub>2</sub> N-h2D               | 303                      | 31238 <sup>b</sup>                                                                  | 66.174                                      | 13               |
| Co-Mo/3DGO                            | 298                      | 7023                                                                                | 35.6                                        | 26               |
| Porous Co <sub>3</sub> O <sub>4</sub> | 298                      | 19520 <sup>b</sup>                                                                  | — <sup>a</sup>                              | S2               |
| Porous Co-B nanoalloy                 | 303                      | 6284 <sup>b</sup>                                                                   | 30                                          | S3               |
| Co/PGO                                | 298                      | 5955                                                                                | 55.22                                       | S4               |
| Co-B/C                                | 298                      | 1127 <sup>b</sup>                                                                   | 57.8                                        | S5               |
| Co@C-700                              | 303                      | — <sup>a</sup>                                                                      | 56.9                                        | S6               |
| dandelion-like Co-Mo-B                | 303                      | 20298 <sup>b</sup>                                                                  | 51                                          | S7               |
| Co-Zn/Ni                              | 298                      | 576 <sup>b</sup>                                                                    | 50.2                                        | S8               |
| Co-P                                  | 303                      | 3300                                                                                | 60.2                                        | S9               |
| Ni-B-silica nanocomposite             | 298                      | 1916 <sup>b</sup>                                                                   | 60.7                                        | S10              |
| NiB/NiFe <sub>2</sub> O <sub>4</sub>  | 298                      | 2999 <sup>b</sup>                                                                   | 72.52                                       | S11              |
| Cu-B                                  | 303                      | 6500 <sup>b</sup>                                                                   | 23.79                                       | S12              |
| Co-CeO <sub>x</sub> /NCNS             | 303                      | 28410                                                                               | 44.16                                       | <b>This work</b> |

a. Not reported or no detailed data are available.

b. HGR value is calculated according to the active component.

## Reference

- (S1) Chen, Y. Z.; Wang, C.; Wu, Z. Y.; Xiong, Y.; Xu, Q.; Yu, S. H.; Jiang, H. L. From Bimetallic Metal-Organic Framework to Porous Carbon: High Surface Area and Multicomponent Active Dopants for Excellent Electrocatalysis. *Adv. Mater.* **2015**, 27 (34), 5010-6
- (S2) Ma, M.; Wei, L.; Jin, F. Porous Co<sub>3</sub>O<sub>4</sub> nanoplatelets as efficient catalyst precursor for hydrogen generation from the hydrolysis of alkaline sodium borohydride solution. *Funct. Mater. Lett.* **2019**, 12 (01), 1850109.
- (S3) Wang, X.; Liao, J.; Li, H.; Wang, H.; Wang, R.; Pollet, B. G.; Ji, S. Highly active porous Co–B nanoalloy synthesized on liquid-gas interface for hydrolysis of sodium borohydride. *Int. J. Hydrogen Energy*, **2018**, 43 (37), 17543-17555.
- (S4) Zhang, H.; Feng, X.; Cheng, L.; Hou, X.; Li, Y.; Han, S. Non-noble Co anchored on nanoporous graphene oxide, as an efficient and long-life catalyst for hydrogen generation from sodium borohydride, *Colloid. Surface A.* **2019**, 563, 112-119.
- (S5) Zhao, J.; Ma, H.; Chen, J. Improved hydrogen generation from alkaline NaBH<sub>4</sub> solution using carbon-supported Co–B as catalysts. *Int. J. Hydrogen Energy*. 2007, 32 (18), 4711-4716.
- (S6) Zhang, X.; Sun, X.; Xu, D.; Tao, X.; Dai, P.; Guo, Q.; Liu, X. Synthesis of MOF-derived Co@C composites and application for efficient hydrolysis of sodium borohydride, *Appl. Surf. Sci.*, **2019**, 469, 764-769.
- (S7) Wei, Y.; Wang, R.; Meng, L.; Wang, Y.; Li, G.; Xin, S.; Zhao, X.; Zhang, K. *Int. J. Hydrogen Energy*. **2017**, 42 (15), 9945-9951.
- (S8) Wei, L.; Ma, M.; Lu, Y.; Zhang, S.; Gao, J.; Dong, X. Electrodeposited Co–Zn on Ni foam as efficient catalysts for hydrogen generation from hydrolysis of sodium borohydride, *Funct. Mater. Lett.*, **2017**, 10 (05), 1750065.
- (S9) Eom, K.; Cho, K.; Kwon, H. Effects of electroless deposition conditions on microstructures of cobalt–phosphorous catalysts and their hydrogen generation properties in alkaline sodium borohydride solution. *J. Power Sources*, **2008**, 180 (1), 484-490.
- (S10) Chen, Y.; Kim, H. Use of a nickel-boride–silica nanocomposite catalyst prepared by in-situ reduction for hydrogen production from hydrolysis of sodium borohydride. *Fuel Process. Technol.* **2008**, 89 (10), 966-972.
- (S11) Liang, Z.; Li, Q.; Li, F.; Zhao, S.; Xia, X. Hydrogen generation from hydrolysis of NaBH<sub>4</sub> based on high stable NiB/NiFe<sub>2</sub>O<sub>4</sub> catalyst. *Int. J. Hydrogen Energy*. **2017**,

42 (7), 3971-3980.

(S12) Bekirogullari, M. Catalytic activities of non-noble metal catalysts (Cu-B, Fe-B, and Ni-B) with *C.Vulgaris* microalgal strain support modified by using phosphoric acid for hydrogen generation from sodium borohydride methanolysis. *Int. J. Hydrogen Energy*. **2019**, *44* (29), 14981-14991.
